# Supplementary material
Source: PubMed Central journal article supplement (PMC2700531)
Supplement: tpc.109.067025_1.pdf [file tpc.109.067025_1.pdf]

Supplemental Data. Karim et al. (2009). A Role for *Arabidopsis PUCHI* in Floral Meristem Identity and Bract Suppression.

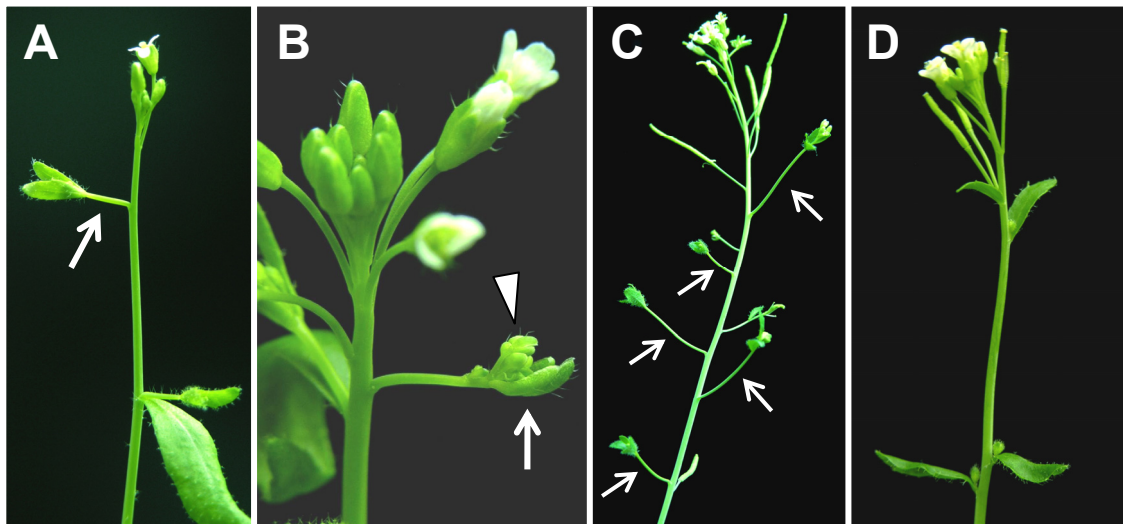

**Supplemental Figure 1.** Inflorescence Phenotypes of the *puchi-2* Mutant.

*puchi-2* mutant plants grown under continuous-light ([A] and [B]) or short-day ([C] and [D]) conditions.

(A) Primary inflorescence. The uppermost secondary inflorescence is not subtended by a cauline leaf (arrow).

(B) Primary inflorescence producing a mosaic structure that is intermediate between a flower (arrow) and an inflorescence-like shoot (arrowhead).

(C) Primary inflorescence grown under short-day conditions, showing the production of ectopic branches (arrows).

(D) An ectopic branch, which is appeared from the primary inflorescence in a position normally occupied by a flower in wild type, is indistinguishable from the primary inflorescence.

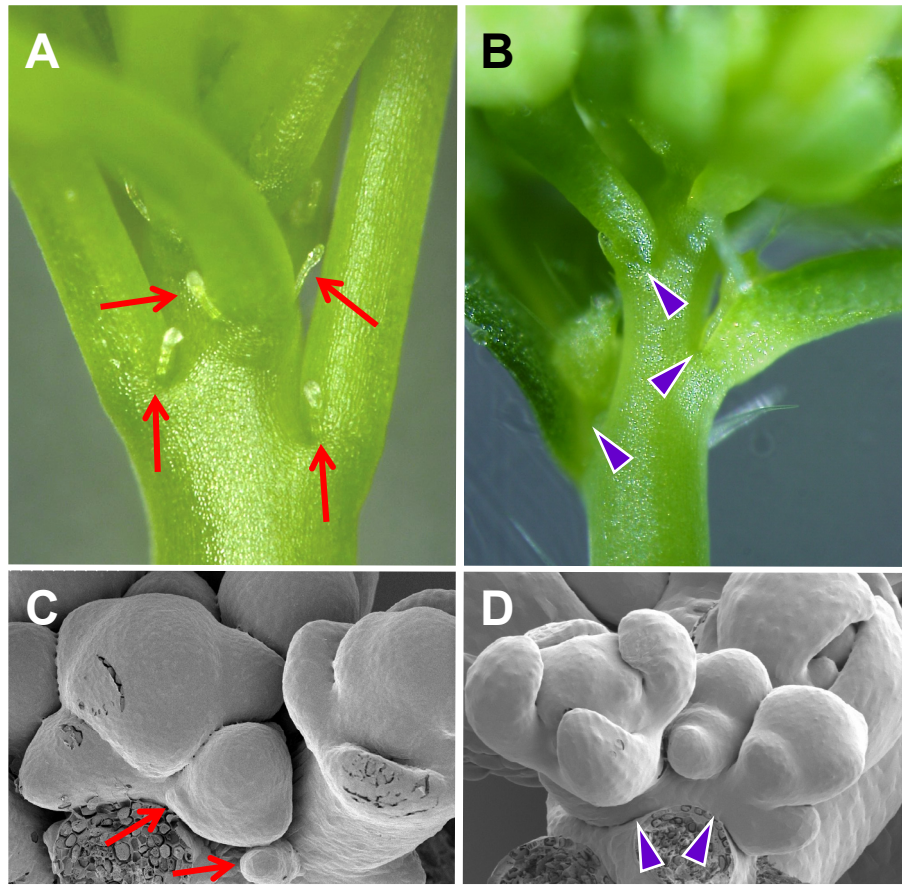

**Supplemental Figure 2.** Formation of Pin-Shaped Projections in *puchi* Is Dependent on the *PRESSED FLOWER* (*PRS*) Gene.

(A) and (B) Close-up view of primary inflorescences of *puchi-1* (A) and *puchi-1 prs* (B) mutants. The pin-shaped projections of *puchi* (arrows in [A]) are lost in the *puchi prs* double mutant (arrowheads in [B]).

(C) and (D) Scanning electron micrographs (SEMs) of *puchi-1* (C) and *puchi-1 prs* double (D) mutant inflorescence apices. The pin-shaped projections of *puchi* (arrows in [C]) are lost in *puchi prs* double mutant flower primordia (arrowheads in [D]).

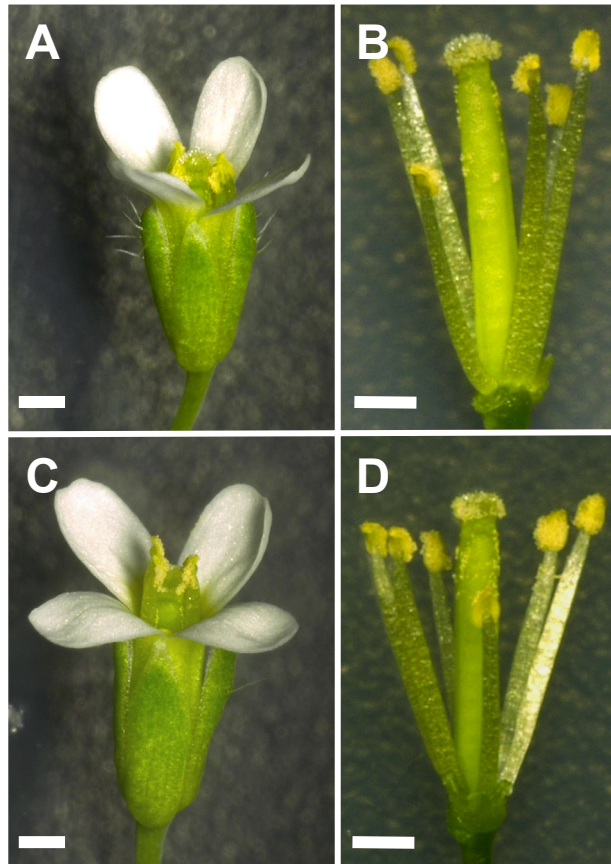

**Supplemental Figure 3.** *puchi* Flower Phenotypes.

(A) to (D) Mature flowers of wild type ([A] and [B]) and *puchi-1* ([C] and [D]). In (B) and (D) sepals and petals were removed to expose the inner two whorls. *puchi* mutant flowers are indistinguishable from those of wild type. Bars = 500  $\mu$ m.

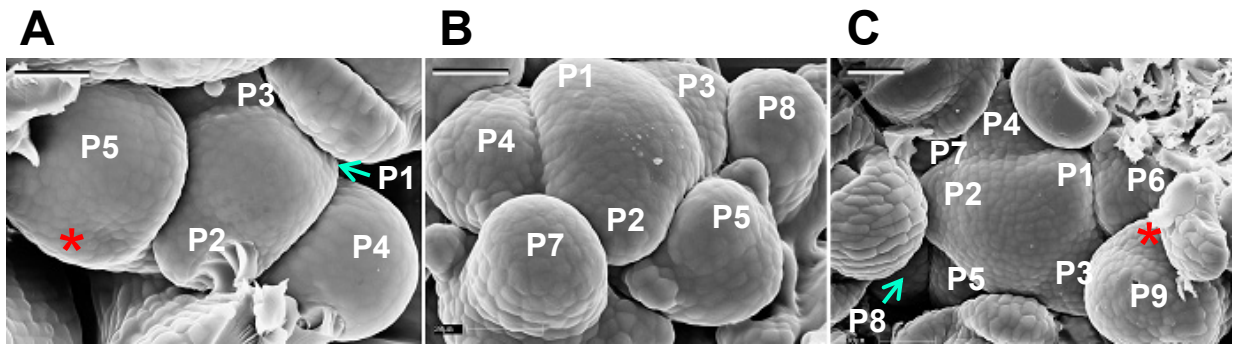

**Supplemental Figure 4.** Sepal Formation Is Delayed in *puchi* Mutant.

(A) to (C) Scanning electron micrographs obtained from replicas of inflorescence shoot apices of wild-type (A) and *puchi-1* (B) and (C) plants are shown to illustrate the delay in sepal (asterisks) formation in the mutant. Numbers indicate the plastochron age of flower primordium. P, flower primordium. Bars = 30  $\mu$ m.

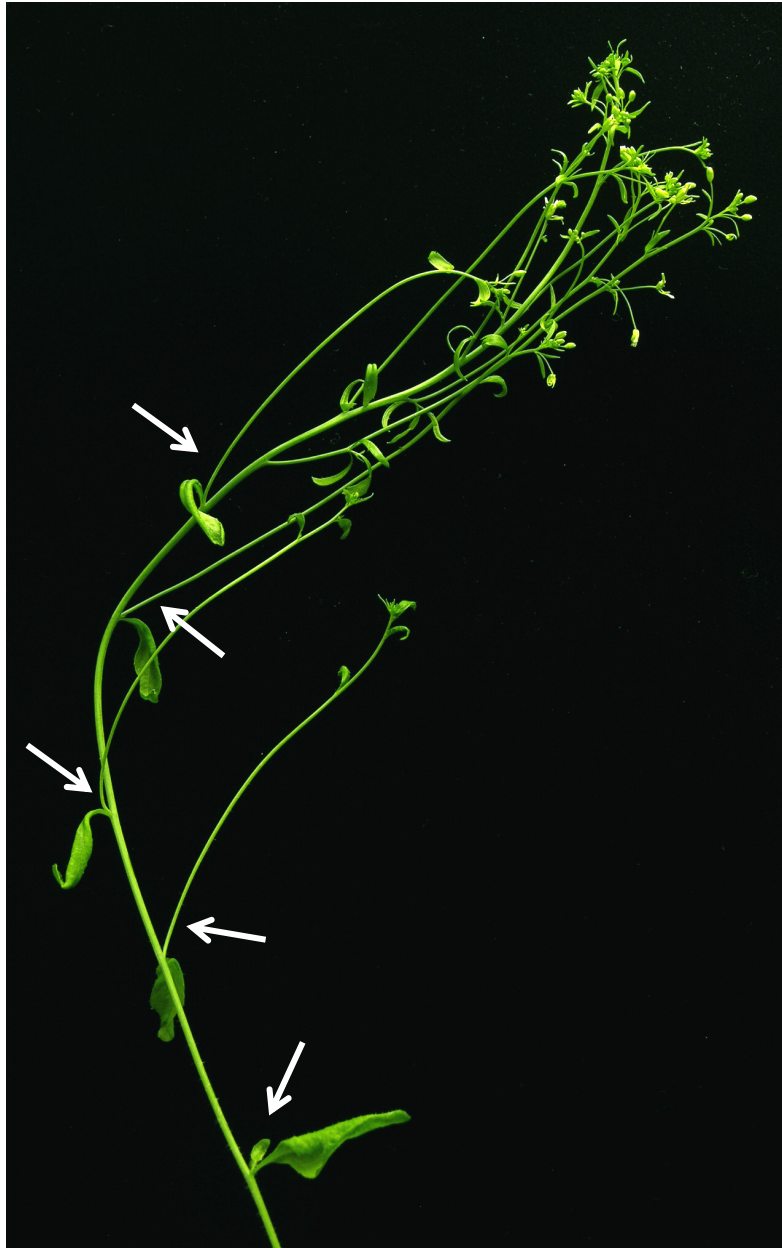

**Supplemental Figure 5.** Fifty-day-old primary inflorescence of the *puchi bop1 bop2* mutant grown under continuous-light conditions. Basal secondary inflorescences are subtended by cauline leaves (arrows).

**Supplemental Table 1.** Number of Rosette Leaves of *puchi* Mutants Grown Under Continuous-Light (CL) and Short-Day (SD) Conditions.

| Condition | Genotype       | No. of rosette leaves | No. of plants scored |
|-----------|----------------|-----------------------|----------------------|
| CL        | Col            | 14.47 ± 0.18          | 30                   |
|           | <i>puchi-1</i> | 14.90 ± 0.24          | 30                   |
|           | <i>puchi-2</i> | 14.77 ± 0.28          | 30                   |
| SD        | Col            | 59.70 ± 1.13          | 20                   |
|           | <i>puchi-1</i> | 61.25 ± 0.89          | 20                   |
|           | <i>puchi-2</i> | 60.10 ± 0.95          | 20                   |

The number of rosette leaves was counted at bolting. Values are mean ± standard error.

---

**Supplemental Table 2.** Floral Architectures of the *puchi-1* Mutant.

---

| Genotype       | Sepals    | Petals      | Stamens     | Carpels   |
|----------------|-----------|-------------|-------------|-----------|
| Col            | 4.0 ± 0.0 | 4.0 ± 0.0   | 5.97 ± 0.02 | 2.0 ± 0.0 |
| <i>puchi-1</i> | 4.0 ± 0.0 | 4.04 ± 0.03 | 5.91 ± 0.04 | 2.0 ± 0.0 |

---

Flowers were dissected and individual floral organs were counted under a stereoscopic microscope. Values are mean ± standard error (n = 45).

---
